# Supplementary material for: Establishment and evaluation of a circAdpgk-0001 knockdown method using CRISPR–Cas13d RNA-targeting technology
Source: PeerJ. 2025 Oct 1;13:e20123. doi: 10.7717/peerj.20123 (PMC12495950; doi:10.7717/peerj.20123)
Supplement: Supplemental Information 9 [file peerj-13-20123-s009.xls]

## Sheet: Sheet1
ITEM TO CHECK	IMPORTANCE	CHECKLIST
EXPERIMENTAL DESIGN
Definition of experimental and control groups	E	Line 104-109
Number within each group	E	Line 161-162
Assay carried out by core lab or investigator's lab?	D	N/A
Acknowledgement of authors' contributions	D	N/A
SAMPLE
Description	E	Line 76-79
Volume/mass of sample processed	D	N/A
Microdissection or macrodissection	E	Line 125-126
Processing procedure	E	Line 112-123
If frozen - how and how quickly?	E	N/A
If fixed - with what, how quickly?	E	N/A
Sample storage conditions and duration (especially for FFPE samples)	E	N/A
NUCLEIC ACID EXTRACTION
Procedure and/or instrumentation	E	Line 125-128
Name of kit and details of any modifications	E	Line 126
Source of additional reagents used	D	N/A
Details of DNase or RNAse treatment	E	Line 127-128
Contamination assessment (DNA or RNA)	E	Line 125-128
Nucleic acid quantification	E	N/A
Instrument and method	E	Line 127-128
Purity (A260/A280)	D	N/A
Yield	D	N/A
RNA integrity method/instrument	E	N/A
RIN/RQI or Cq of 3' and 5' transcripts	E	N/A
Electrophoresis traces	D	N/A
Inhibition testing (Cq dilutions, spike or other)	E	N/A
REVERSE TRANSCRIPTION
Complete reaction conditions	E	Line 128-129
Amount of RNA and reaction volume	E	Line 128-129
Priming oligonucleotide (if using GSP) and concentration	E	Line 128-129
Reverse transcriptase and concentration	E	Line 128-129
Temperature and time	E	Line 128-129
Manufacturer of reagents and catalogue numbers	D	N/A
Cqs with and without RT	D*	N/A
Storage conditions of cDNA	D	N/A
qPCR TARGET INFORMATION
If multiplex, efficiency and LOD of each assay.	E	N/A
Sequence accession number	E	Line 81-82
Location of amplicon	D	N/A
Amplicon length	E	N/A
In silico specificity screen (BLAST, etc)	E	N/A
Pseudogenes, retropseudogenes or other homologs?	D	N/A
Sequence alignment	D	N/A
Secondary structure analysis of amplicon	D	N/A
Location of each primer by exon or intron (if applicable)	E	N/A
What splice variants are targeted?	E	N/A
qPCR OLIGONUCLEOTIDES
Primer sequences	E	Table S2
RTPrimerDB Identification Number	D	N/A
Probe sequences	D**	N/A
Location and identity of any modifications	E	N/A
Manufacturer of oligonucleotides	D	N/A
Purification method	D	N/A
qPCR PROTOCOL
Complete reaction conditions	E	Line 129-133
Reaction volume and amount of cDNA/DNA	E	Line 129-133
Primer, (probe), Mg++ and dNTP concentrations	E	Line 129-133
Polymerase identity and concentration	E	Line 129-133
Buffer/kit identity and manufacturer	E	Line 130
Exact chemical constitution of the buffer	D	N/A
Additives (SYBR Green I, DMSO, etc.)	E	Line 129-133
Manufacturer of plates/tubes and catalog number	D	N/A
Complete thermocycling parameters	E	Line 129-133
Reaction setup (manual/robotic)	D	N/A
Manufacturer of qPCR instrument	E	Line 130
qPCR VALIDATION
Evidence of optimisation (from gradients)	D	N/A
Specificity (gel, sequence, melt, or digest)	E	N/A
For SYBR Green I, Cq of the NTC	E	N/A
Standard curves with slope and y-intercept	E	N/A
PCR efficiency calculated from slope	E	N/A
Confidence interval for PCR efficiency or standard error	D	N/A
r2 of standard curve	E	N/A
Linear dynamic range	E	N/A
Cq variation at lower limit	E	N/A
Confidence intervals throughout range	D	N/A
Evidence for limit of detection	E	N/A
If multiplex, efficiency and LOD of each assay.	E	N/A
DATA ANALYSIS
qPCR analysis program (source, version)	E	Line 130
Cq method determination	E	Line 134-135
Outlier identification and disposition	E	N/A
Results of NTCs	E	N/A
Justification of number and choice of reference genes	E	Line 134
Description of normalisation method	E	Line 134-135
Number and concordance of biological replicates	D	N/A
Number and stage (RT or qPCR) of technical replicates	E	Line 133
Repeatability (intra-assay variation)	E	N/A
Reproducibility (inter-assay variation, %CV)	D	N/A
Power analysis	D	N/A
Statistical methods for result significance	E	Line 164-169
Software (source, version)	E	Line 164-169
Cq or raw data submission using RDML	D	N/A
Table 1. MIQE checklist for authors, reviewers and editors. All essential information (E) must be submitted with the manuscript. Desirable
information (D) should be submitted if available. If using primers obtained from RTPrimerDB, information on qPCR target, oligonucleotides,
protocols and validation is available from that source.
*: Assessing the absence of DNA using a no RT assay is essential when first extracting RNA. Once the sample has been validated as
RDNA-free, inclusion of a no-RT control is desirable, but no longer essential.
**: Disclosure of the probe sequence is highly desirable and strongly encouraged. However, since not all commercial pre-designed assay
vendors provide this information, it cannot be an essential requirement. Use of such assays is advised against.
